# Supplementary material for: Differential Expression of Genes between a Tolerant and a Susceptible Maize Line in Response to a Sugarcane Mosaic Virus Infection
Source: MDPI journal article supplement (doi:10.3390/v14081803), 2022-08-17
Supplement: s1 [file s1]

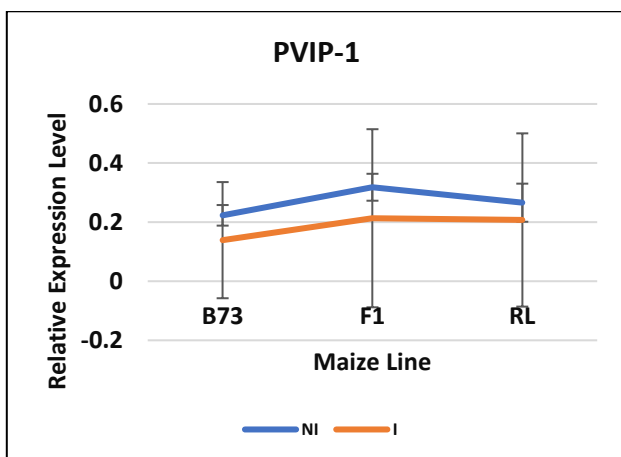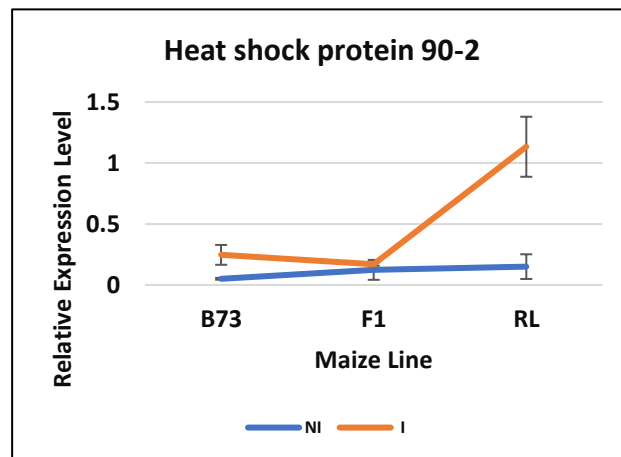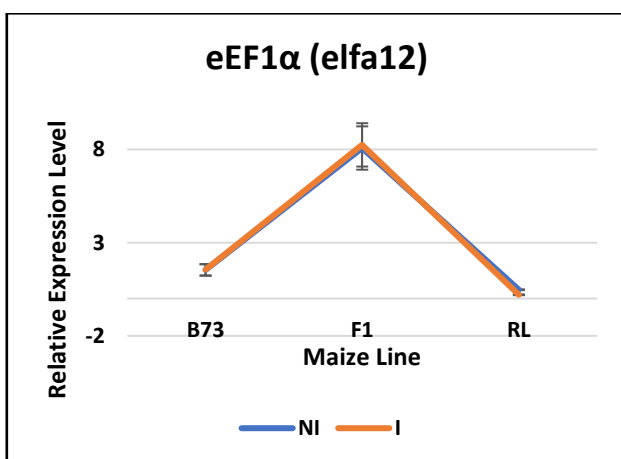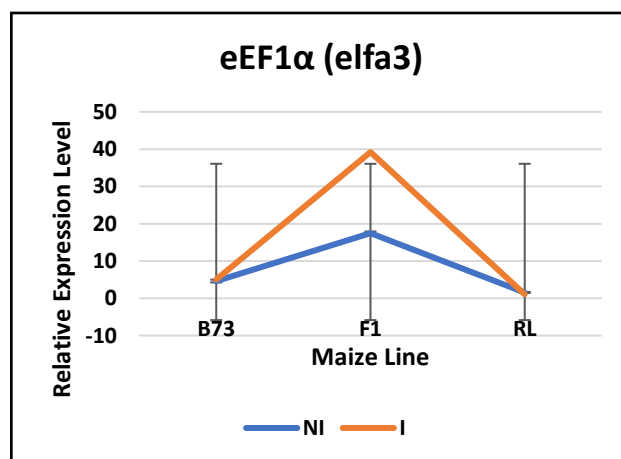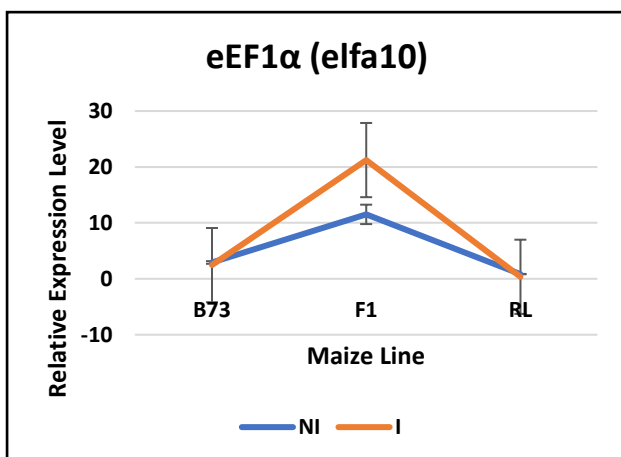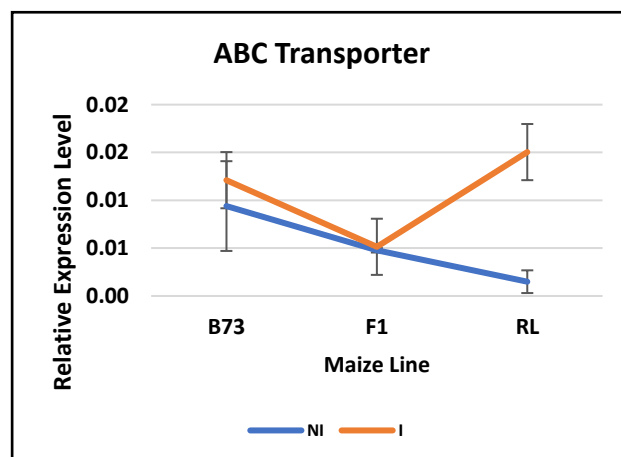

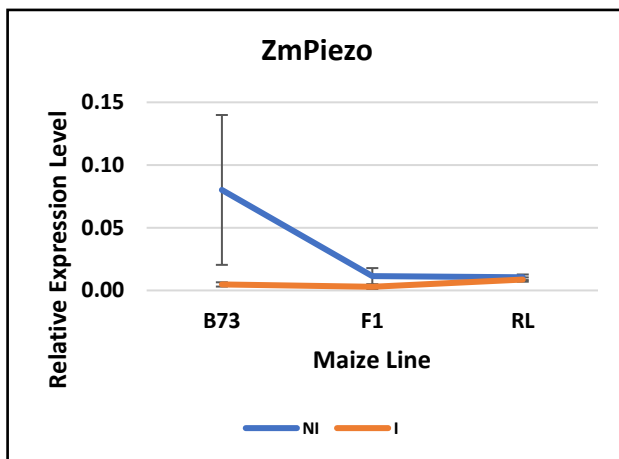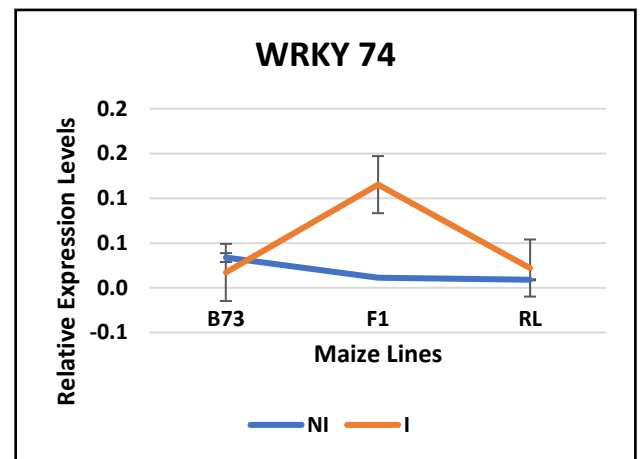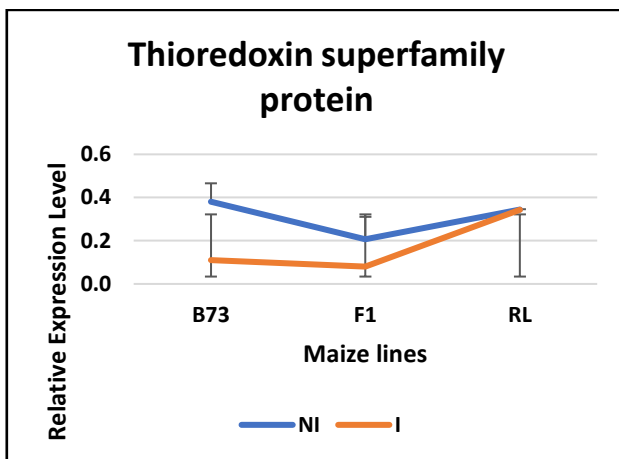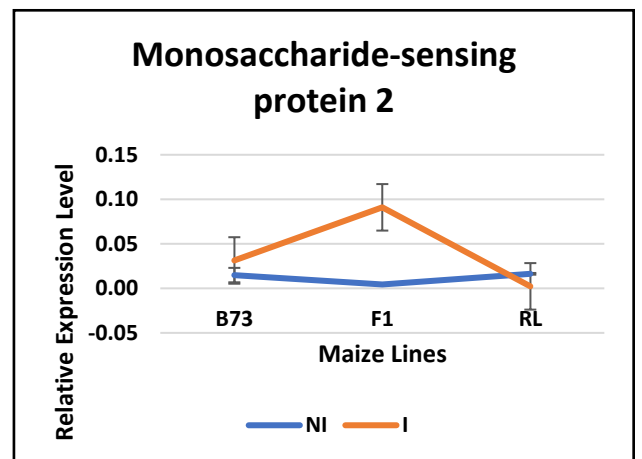

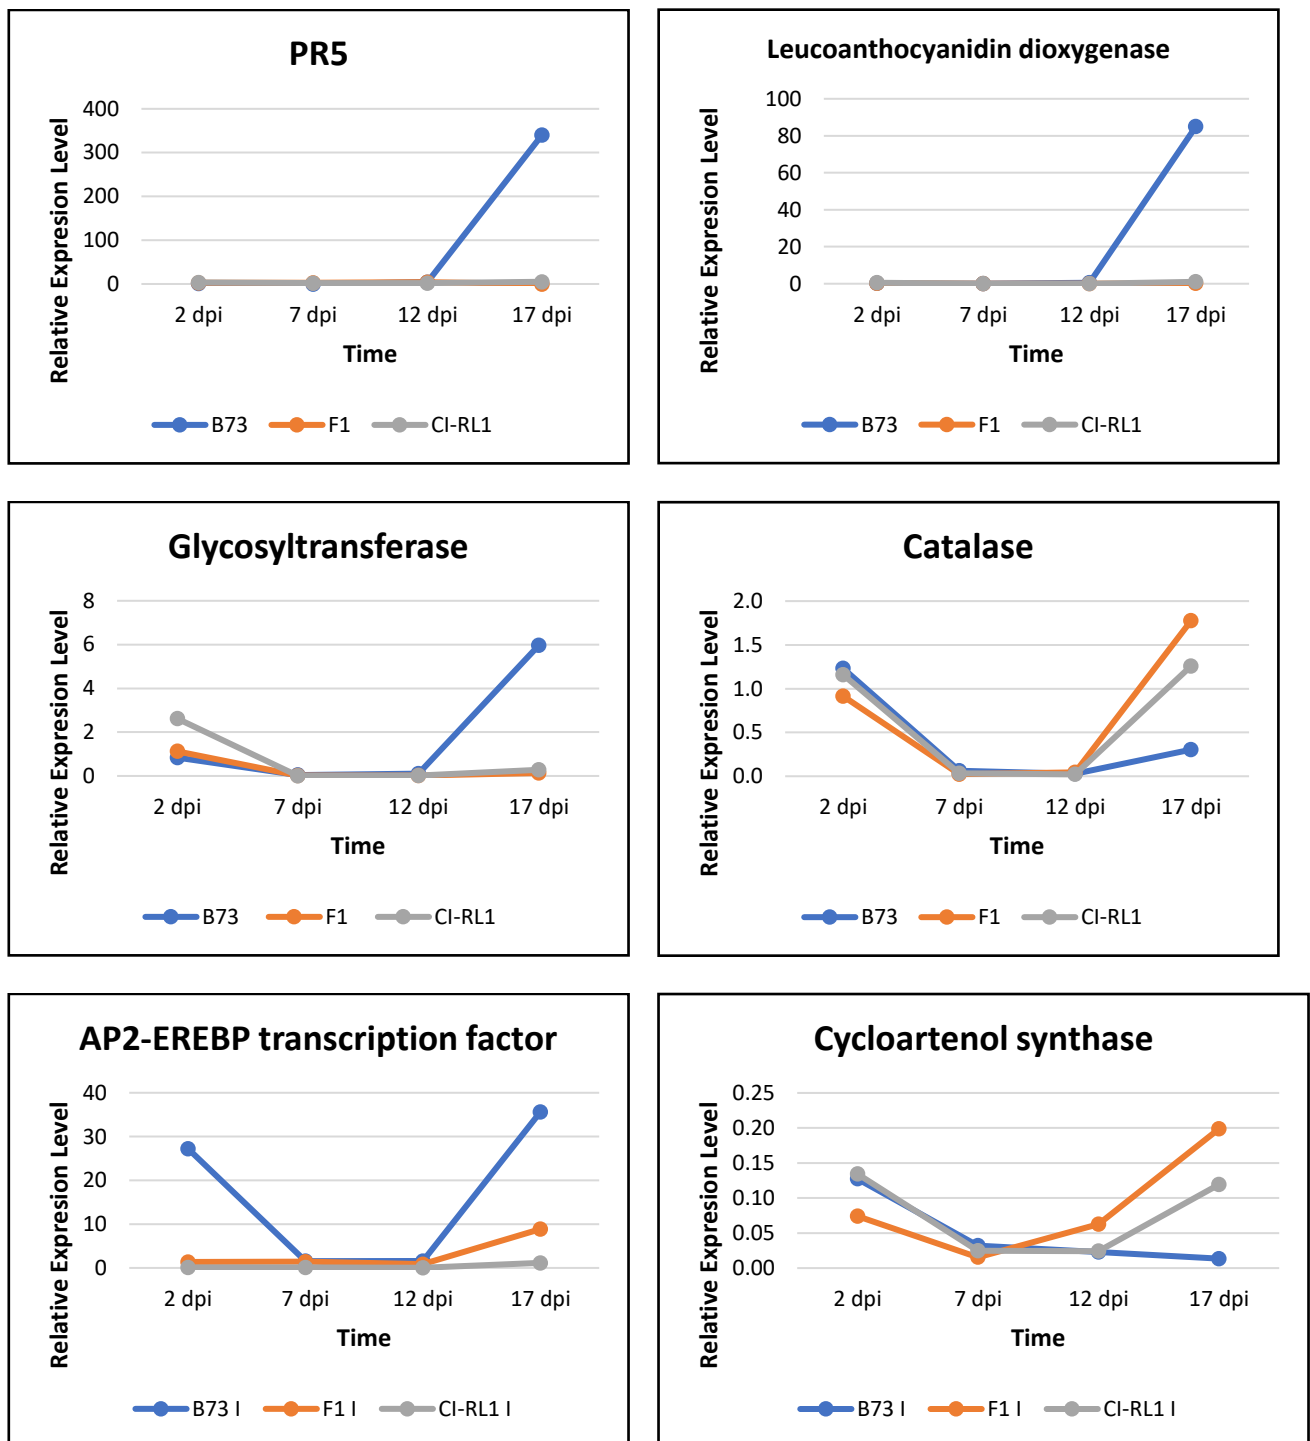

**Figure S1.** Relative expression levels of 10 genes obtained from Biological Process (BPs) and 6 from the comparison of different criteria. NI= non-SCMV inoculated/mock (blue); I= SCMV Inoculated (red).

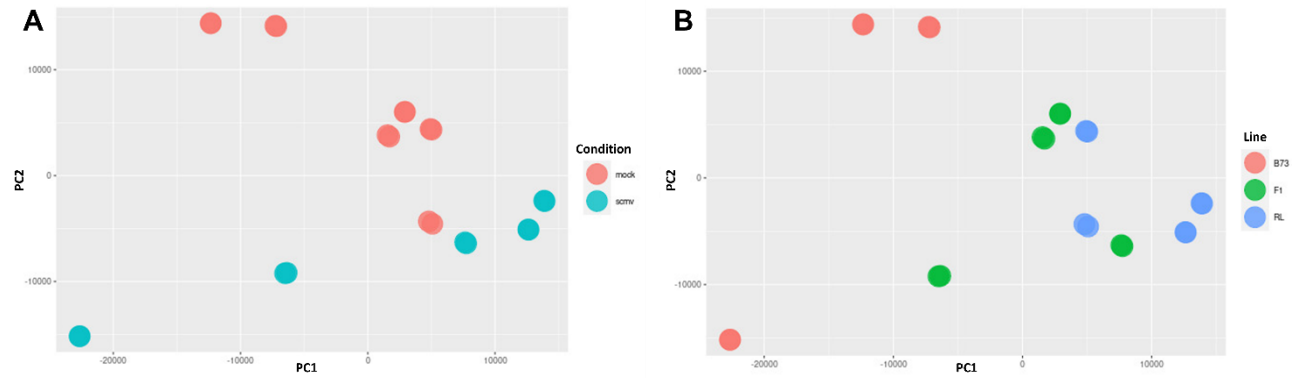

**Figure S2.** Principal components analysis (PCAs) of the libraries generated in this work. Libraries were analyzed by condition (**A**; mock in red or SCMV-inoculated in blue) or by line (**B**; B73 in red, F1 in green and CI-RL1 in blue)

**Table S1.** Eukaryotic initiation factors (eIFs) and eukaryotic elongations factors (eEFs) annotated in the MaizeGDB database. The corresponding gene model in B73 RefGen\_v3 is cited under the “MaizeGDB GM” column. The gene models within the genomes Zm-B73-REFERENCE-GRAMENE-4.0 and Zm-B73-REFERENCE-NAM-5.0 are cited in the “Associated GMs” column. The “Arabidopsis Best hit” column shows the information found in the “Annotations” section of the gene model in MaizeGDB.

| Annotation                                        | MaizeGDB GM      | Associated GMs                                       | Arabidopsis Best Hit                                        |
|---------------------------------------------------|------------------|------------------------------------------------------|-------------------------------------------------------------|
| eukaryotic initiation factor 3 (eif-3)            | GRMZM2G093050    | Zm00001d039518<br>Zm00001eb121480                    | -                                                           |
| eucaryotic initiation factor4 (eif-4)             | GRMZM2G116034    | Zm00001d014673<br>Zm00001eb226920                    | -                                                           |
| eukaryotic initiation factor4a (eif-4a)           | GRMZM2G027995    | Zm00001d036480<br>Zm00001eb272920                    | -                                                           |
| eucaryotic translation initiation factor5 (eif-5) | GRMZM2G165917    | Zm00001d000300<br>Zm00001eb208030                    | AT1G36730 (Translation initiation factor IF2/IF5)           |
| eucaryotic initiation factor6 (eif-6)             | GRMZM2G002616    | Zm00001d041682<br>Zm00001eb137550                    | AT4G18040 (eIF4E)                                           |
| eucaryotic initiation factor7 (eif-7)             | GRMZM2G022019    | Zm00001d014065<br>Zm00001eb222060                    | AT5G35620 (eIF(iso)4E)                                      |
| eIF4E* (Not annotated)                            | GRMZM2G113096    | Zm00001d041973<br>Zm00001eb139930                    | AT4G18040 (eIF4E)                                           |
| elongation initiation factor 2 (eif-2)            | GRMZM2G107654    | Zm00001d021815<br>Zm00001eb324510                    | AT1G04170 (EIF2 GAMMA)                                      |
| elongation initiation factor5A (eif-5a)           | GRMZM2G113696    | Zm00001d006760<br>Zm00001eb108410                    | AT1G13950 (EIF-5A)                                          |
| Elfa1 - elongation factor $\alpha$ 1              | GRMZM2G151193    | Zm00001d009868<br>Zm00001eb346210                    | AT1G07930 (GTP binding Elongation factor Tu family protein) |
| elfa2 - elongation factor $\alpha$ 2              | GRMZM2G149768    | Zm00001eb285220                                      | AT1G07940 (GTP binding Elongation factor Tu family protein) |
| elfa3 - elongation factor $\alpha$ 3              | GRMZM2G154218    | Zm00001d037873<br>Zm00001eb285210                    | AT1G07920 (GTP binding Elongation factor Tu family protein) |
| elfa6 - elongation factor $\alpha$ 6              | GRMZM2G057535    | Zm00001d021788<br>Zm00001eb324270<br>Zm00001eb324280 | AT1G07930                                                   |
| elfa7 - elongation factor $\alpha$ 7              | GRMZM2G110509    | Zm00001d009870<br>Zm00001eb346230                    | AT1G07920                                                   |
| elfa9 - elongation factor 1 $\alpha$ 9            | GRMZM2G153541    | Zm00001d046449<br>Zm00001eb385900                    | AT1G07930, AT1G07940                                        |
| elfa10 - elongation factor 1 $\alpha$ 10          | GRMZM2G343543    | Zm00001d036904<br>Zm00001eb276860                    | AT1G07920, AT5G60390                                        |
| elfa11 - elongation factor $\alpha$ 11            | AC233866.1_FG006 | Zm00001d037905<br>Zm00001eb285450                    | AT1G07940                                                   |
| elfa12 - elongation factor 1- $\alpha$ -like 12   | GRMZM2G001327    | Zm00001d037877<br>Zm00001eb285230                    | AT1G07930, AT1G07940                                        |

**Table S2.** List of the resistance candidate genes searched for in the expression pattern clusters. The name of the gene (and its abbreviation), the organism, and the National Center for Biotechnology Information (NCBI) accession number of the sequence that was used are also shown. Additionally, the alteration of the viral cycle related to the gene mutation is listed in the column “Resistance at”. Finally, the corresponding candidate gene model in maize is provided in the “Best hit maizeGDB” column.

| Gene                                                |                       | Organism    | Resistance at                                               | Sequence (GenBank) | Best hit maizeGDB |
|-----------------------------------------------------|-----------------------|-------------|-------------------------------------------------------------|--------------------|-------------------|
| Synaptotagmin                                       | <i>SYTA</i>           | Arabidopsis | Cell-to-cell movement                                       | NM_127668.4        | GRMZM2G050193     |
| Fibrillarin                                         | <i>Fibrillarin</i>    | Benthamian  | Long-distance movement                                      | AM269909           | GRMZM2G150648     |
| DEAD-box protein/Ded1p                              | <i>DED1</i>           | Yeast       | RNA replication                                             | NC_001147.6        | GRMZM2G403636     |
| Re initiation supporting protein                    | <i>RISP</i>           | Arabidopsis | Transactivation/viral amplification                         | NM_125513.1        | GRMZM2G146416     |
| Acyl coenzyme A binding protein 1                   | <i>ACBP1</i>          | Arabidopsis | Activity of RNA replication complexes                       | AT5G53470.1        | GRMZM2G108138     |
| SNARE-Protein Syp71                                 | <i>SYP71</i>          | Arabidopsis | Mediating the fusion of viral vesicles with chloroplast     | NM_111809          | GRMZM2G057251     |
| Chloroplast phosphoglycerate kinase                 | <i>Chl-PGK</i>        | Benthamiana | Targeting of chloroplast                                    | HQ450764.1         | GRMZM2G083016     |
| ADP ribosylation factor 1                           | <i>ARF1</i>           | Arabidopsis | Virus replication                                           | NM_102198.5        | GRMZM2G395844     |
| Sm motif protein, Lsm1p                             | <i>LSM1</i>           | Yeast       | Virus replication                                           | NM_001181557.1     | GRMZM2G021464     |
| Glyceraldehyde-3-phosphate dehydrogenase            | <i>GPDH</i>           | Benthamiana | Virus replication                                           | -                  | GRMZM2G046804     |
| Heat shock protein 70                               | <i>Hsp70</i>          | Benthamiana | Assemble of replicase complex/Enhance viral RNA replication | KX912913.1         | GRMZM2G340251     |
| Heat shock protein 90                               | <i>Hsp90</i>          | Benthamiana | Assemble of replicase complex                               | LC314272.1         | GRMZM2G012631     |
| <i>Prunus persica</i> DEAD-box RNA helicase-like    | <i>PpDDXL (eIF4E)</i> | Peach       | Viral genome translation and replication                    | GQ865547.1         | GRMZM2G027995     |
| Poly (A)-binding protein 2                          | <i>PBAP2</i>          | Arabidopsis | Virus accumulation                                          | NM_119572          | GRMZM2G352129     |
| Poly (A)-binding protein 4                          | <i>PABP4</i>          | Arabidopsis | Virus accumulation                                          | NM_127899          | GRMZM2G102829     |
| Poly (A)-binding protein 8                          | <i>PBAP8</i>          | Arabidopsis | Virus accumulation                                          | NM_103863          | GRMZM2G013619     |
| Tobamovirus multiplication 1                        | <i>TOM1</i>           | Arabidopsis | Efficient viral multiplication                              | NM_118299          | GRMZM2G020281     |
| Tobamovirus multiplication 2A                       | <i>TOM2A</i>          | Arabidopsis | Efficient viral multiplication                              | NM_102974          | GRMZM2G049422     |
| Host Small GTP-binding Protein                      | <i>ARL8</i>           | Arabidopsis | Viral RNA replication                                       | NM_114847          | GRMZM2G081622     |
| Plasmodesmata-located protein                       | <i>PDLP</i>           | Arabidopsis | Cell-to-cell trafficking                                    | NM_123765.3        | GRMZM2G066860     |
| Pectin methyl esterase                              | <i>PME</i>            | Tomato      | Cell-to-cell movement                                       | U49330.1           | GRMZM2G136106     |
| Myosin X-2                                          | <i>Myosin</i>         | Benthamiana | Intercellular movement                                      | DQ875135.1         | GRMZM2G435294     |
| Actin                                               | <i>Actin</i>          | Benthamiana | Intercellular movement                                      | JQ256516.1         | GRMZM2G104017     |
| Plasma-membrane associated cation-binding protein 1 | <i>Pcap1</i>          | Arabidopsis | Facilitates movement                                        | NM_118145.4        | GRMZM2G071089     |
| COPII coatomer Sec24a                               | <i>Sec24a(ERMO2)</i>  | Arabidopsis | Cell-to-cell movement                                       | NM_111590.4        | GRMZM2G081745     |
| Chloroplast phosphoglycerate kinase                 | <i>cPGK2</i>          | Arabidopsis | Virus accumulation                                          | NM_104498          | GRMZM2G047028     |
| ROOT HAIR DEFECTIVE 3                               | <i>RHD3</i>           | Arabidopsis | Cell-to-cell spread                                         | NM_112241.4        | GRMZM2G390374     |
| TORTIFOLIA1/SPIRAL2                                 | <i>TOR1</i>           | Arabidopsis | Virus spread                                                | NM_118840          | GRMZM2G026309     |

| Gene                                         |                  | Organism    | Resistance at                                                          | Sequence (GenBank) | Best hit maizeGDB |
|----------------------------------------------|------------------|-------------|------------------------------------------------------------------------|--------------------|-------------------|
| TORTIFOLIA 2                                 | <i>TOR2</i>      | Arabidopsis | Virus spread                                                           | NM_100360          | GRMZM2G152466     |
| DNA-binding protein phosphatase 1            | <i>DBP1</i>      | Arabidopsis | Interaction with eIF4E/Virus accumulation                              | NM_128120          | GRMZM2G158734     |
| Cucumis melo Vacuolar Protein Sorting 41     | <i>CmVPS41</i>   | Melon       | Viral loading in the phloem                                            | MELO3C004827       | GRMZM2G040247     |
| Ethylene-inducible transcription factor RAV2 | <i>RAV2</i>      | Arabidopsis | Suppression of RNA silencing                                           | NM_10555858        | GRMZM2G169654     |
| Calmodulin-related protein                   | <i>rgs-CaM</i>   | Tobacco     | Suppression of PTGS                                                    | AF329729.1         | GRMZM2G104523     |
| S-adenosyl-L-methionine synthetase           | <i>OsSAMS1</i>   | Rice        | Enhanced production of ethylene                                        | Os05g0135700       | GRMZM2G117198     |
| Rab GTPase                                   | <i>AtRAN-F2b</i> | Arabidopsis | Colocalization of MP in pre-vacuolar late endosomal compartments       | NM_118084          | GRMZM2G131254     |
| Protein Kinase                               | <i>CK2</i>       | Tobacco     | Viral replication/CP accumulation                                      | AF374474.1         | GRMZM2G047855     |
| Catalase 1                                   | <i>CAT1</i>      | Benthamiana | Enhance virus accumulation                                             | EU998969.1         | GRMZM2G088212     |
| Rice dwarf virus multiplication 1            | <i>RIM1</i>      | Rice        | Virus multiplication/CP accumulation                                   | Os03g0119966       | GRMZM2G174070     |
| Formate dehydrogenase                        | <i>FDH1</i>      | Pepper      | Reduced virus accumulation/systemic spread                             | CA02g29530         | GRMZM2G049811     |
| Calreticulin                                 | <i>CTR3</i>      | Arabidopsis | Reduced virus accumulation/Not infection observed in inoculated leaves | AT1G08450          | GRMZM2G028516     |
| Protein disulfide isomerase-like 5-1         | <i>PDIL5</i>     | Rice        | Virus replication                                                      | XP_015628450.1     | GRMZM2G073628     |
| Movement Protein I 7                         | <i>MPI7</i>      | Arabidopsis | Virus infectivity                                                      | N65789.1           | GRMZM5G831519     |
| Substrate bZIP60                             | <i>bZIP60</i>    | Benthamiana | Viral pathogenesis                                                     | NM_001324734.1     | GRMZM2G025812     |
| Inositol-requiring protein-1 A               | <i>IRE1A</i>     | Arabidopsis | Viral symptoms delayed/Viral accumulation                              | NM_127306.4        | GRMZM2G162167     |
| Inositol-requiring protein-1 B               | <i>IRE1B</i>     | Arabidopsis | Viral symptoms delayed/Viral accumulation                              | NM_001203453.2     | GRMZM2G137944     |
| Essential for potyvirus Accumulation 1       | <i>EXA1</i>      | Arabidopsis | Viral accumulation                                                     | NM_123660.3        | GRMZM2G480002     |
| Glucan synthase-like 4                       | <i>GSL4</i>      | Arabidopsis | Plasmodesmata permeability                                             | ACS36250.1         | GRMZM2G326643     |
| $\beta$ -1,3-glucanase                       | <i>BG3</i>       | Tobacco     | Callose degradation                                                    | CAA82271.1         | GRMZM2G335111     |
| Tomato spotted wilt virus resistance 1       | <i>TSW</i>       | Pepper      | Viral genome translation and replication                               | KT751527           | GRMZM2G173647     |
| eIF4E                                        | <i>Sbm1</i>      | Pea         | Viral genome translation and replication                               | AY611423           | GRMZM2G002616     |
| eIF4E                                        | <i>mo1/pot-1</i> | Lettuce     | Viral genome translation and replication                               | AF530162           | GRMZM2G002616     |
| eIF4E                                        | <i>L3</i>        | Pepper      | Viral genome translation and replication                               | AB523370           | GRMZM2G038388     |
| eIF4E                                        | <i>pvr1</i>      | Pepper      | Viral genome translation and replication                               | ABV54210           | GRMZM2G002616     |
| eIF4E                                        | <i>PVR4</i>      | Pepper      | Viral genome translation and replication                               | KT359375           | GRMZM2G173647     |
| Potyvirus VPg Interacting Protein            | <i>PVIP1</i>     | Pea         | Systemic spread                                                        | NM_111657.4        | GRMZM2G162786     |
| Atypical thioredoxin h                       | <i>ZmTrx h</i>   | Maize       | Long distance movement                                                 | -                  | GRMZM2G014055     |
| Piezo-like ion mechano-channel               | <i>ZmPiezo</i>   | Arabidopsis | Systemic movement                                                      | At2g48060          | GRMZM2G329944     |

**Table S3.** Candidate genes found in group 1 (blue) and group 2 (red) of the expression pattern clusters. The viral cycle process affected is listed in column “Resistance at”. A total of nine genes were found to interfere with viral translation (TT), four with cell-to-cell (CC) movement, and two with long-distance movement (LD).

| Cluster      | Gen            | Resistant at                               | TT       | CC       | LD       |
|--------------|----------------|--------------------------------------------|----------|----------|----------|
| C0 C1 C2     | <i>BG3</i>     | Callose degradation/ Cell-to-cell movement |          | 1        |          |
| C0 C1        | <i>EXA1</i>    | Viral accumulation                         | 1        |          |          |
| C0 C2        | <i>LSM1</i>    | Virus replication                          | 1        |          |          |
|              | <i>PVIP</i>    | Systemic spread                            |          |          | 1        |
| C0           | <i>PpDDXL</i>  | Viral genome translation and replication   | 1        |          |          |
|              | <i>IRE1A</i>   | Viral symptoms delayed/Viral accumulation  | 1        |          |          |
|              | <i>ZmPiezo</i> | Systemic movement                          |          |          | 1        |
|              | <i>RIM1</i>    | Virus multiplication/CP accumulation       | 1        |          |          |
|              | <i>Chl-PGK</i> | Targeting of chloroplast                   | 1        |          |          |
| C1           | <i>RISP</i>    | Transactivation/viral amplification        | 1        |          |          |
|              | <i>OsSAMS1</i> | Enhanced production of ethylene            |          |          |          |
| C2           | <i>Pcap1</i>   | Facilitates movement                       |          | 1        |          |
|              | <i>Myosin</i>  | Intercellular movement                     |          | 1        |          |
| C3           | <i>PBAP8</i>   | Virus accumulation                         | 1        |          |          |
| C4           | <i>IRE1B</i>   | Viral symptoms delayed/Viral accumulation  | 1        |          |          |
|              | <i>PDLP</i>    | Cell-to-cell trafficking                   |          | 1        |          |
| <b>Total</b> |                |                                            | <b>9</b> | <b>4</b> | <b>2</b> |

**Table S4.** List of primers used in this work.

| Primer name | Target                                       | Sequence              |                       |
|-------------|----------------------------------------------|-----------------------|-----------------------|
|             |                                              | Forward               | Reverse               |
| qABC        | ABC transporter B family member 21           | CCTCACTGGTTCTCTGGCTC  | GAACGTCTCCAGCTTCCTC   |
| qBTub       | Beta tubulin                                 | CATCTGCTATGTTCCGTGGGA | CGAGTTGCCGATGAATGTGG  |
| qE1A1       | Elongation factor 1-alpha ( <i>elfa12</i> )  | CATTGATGCCCCCTGGACAC  | CAAGGAGAGCATGTTACGG   |
| qE1A2       | Elongation factor 1-alpha ( <i>elfa3</i> )   | GCCAGCTTCACCTCCAG     | CACCATACCAGCATCACCG   |
| qE1A3       | Elongation factor 1-alpha ( <i>elfa10</i> )  | GAAGCGTGGGTATGTGGC    | GCCAGACCGCTATCAATC    |
| qHS         | Heat shock protein 90-2                      | GTGAGACCCTCCAGCAGAAC  | GCAGCTCCGAATCTTGTTT   |
| qPVP1       | Homolog to Potyvirus VPg-Interacting Protein | CAGGTTGGCTCGCTGACAT   | TCCGCCCTTACTCACAAC    |
| qMSP        | Monosaccharide-sensing protein 2             | CGGACGATATCTTGGAGGAC  | CACAGTGGGCTCATTTTGC   |
| SCMV-CP     | SCMV-Ver1 Coat Protein                       | AACCAGTGGCTCAGGAAC    | TTGTTTCATCTCCGTCCATCA |
| qSCMV-CP    | SCMV-Ver1 Coat Protein (for real time PCR)   | GCCAAGATACGGACTTCAGC  | CATGTGGGCTTCCTTAGCTC  |
| qTxS        | Thioredoxin superfamily protein              | GTGTTGGTCGCACGTTCTTC  | GTGCCCTCGTCTTCCTTG    |
| qWRK74      | Probable WRKY transcription factor 74        | GAAGGTGTGCTGGGAAGGAG  | CCTCCACGAGAACTCATCAGC |
| qZmPiezo    | Homolog to PIEZO-like protein                | GTGCCTTGTCTTTGCATTTC  | CACTCACGGCAATGGACTTC  |
| qPR5        | Pathogen Related Protein5                    | GCAGCCAGGACTTCTACGAC  | GGGCAGAAGGTGACTTGCTAG |
| qLeu-dx     | Leucoanthocyanidin dioxygenase               | CTCACTCGCCATGTTCTACG  | CTCTGTCCTTCGCAATTTC   |
| qGly        | Glycosyltransferase                          | GTGGTACACGAGGAGGAAGC  | GCCGCAGTGACTCATGAAC   |
| qCat        | Catalase                                     | GGTTCCGGTCAAGTTCTAC   | CGAGAAGAAGTCGAGGATGC  |
| qAP2        | AP2-EREBP transcription factor               | GGGACATGGACTTGGACTTG  | GTTGGTGGAGCTTATTGCTG  |
| qCAS        | Cycloartenol synthase                        | GAGGGCGAGAAGACAACAAG  | CTTCGGATTGCTGAGGAAG   |
